# Supplementary material for: Spatial and temporal variations of SPM, RPM, SO2 and NOx concentrations in an opencast coal mining areaElectronic supplementary information (ESI) available: Five figures showing polynomial regression analyses of monthly averages of RPM concentrations for the residential and industrial areas during a one year period, spatial distribution of seasonal RPM concentrations over the study area for winter, summer, autumn and rainy seasons, and variations of SO2 and NOx concentrations in the study area with annual average, and 24 h average maximum, minimum and 95th percentile values. See http://www.rsc.org/suppdata/em/b3/b309372g/
Source: Royal Society of Chemistry journal article supplement (doi:10.1039/b309372g), 2004-01-01
Supplement: b309372g.doc [file b309372g.doc]

**ELECTRONIC SUPPLEMENTARY INFORMATION**

# This journal is © The Royal Society of Chemistry 2003

**
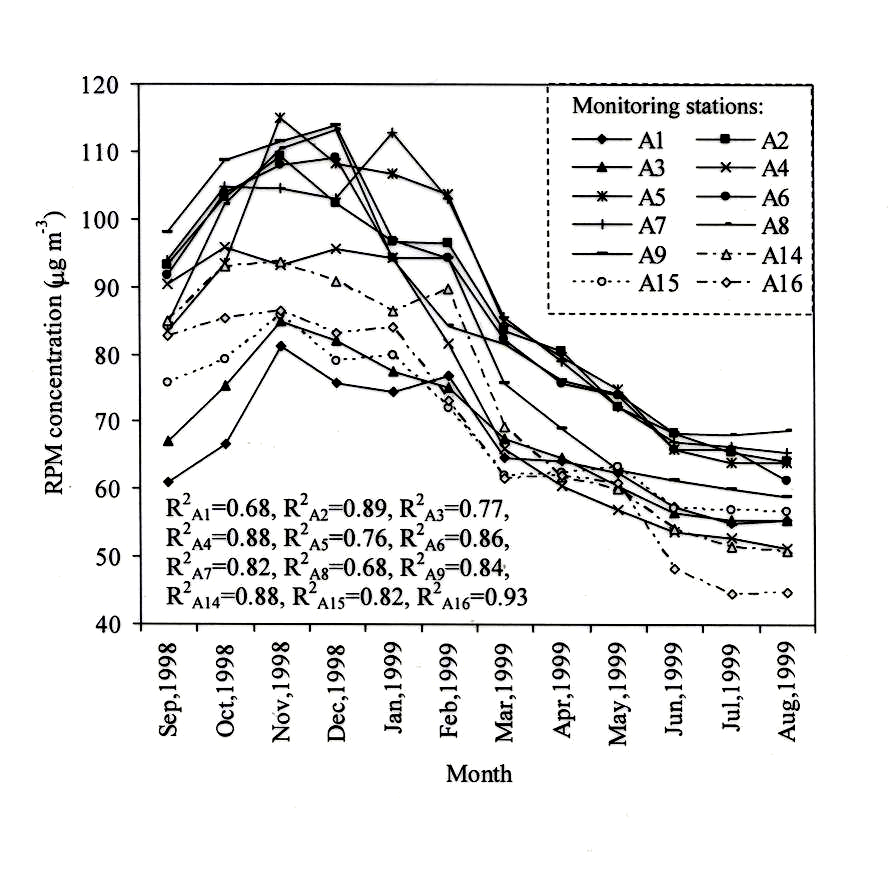
**

**Fig. I** Polynomial regression analysis of monthly average of RPM concentrationfor the

monitoring stations in the residential area during one year period.

**
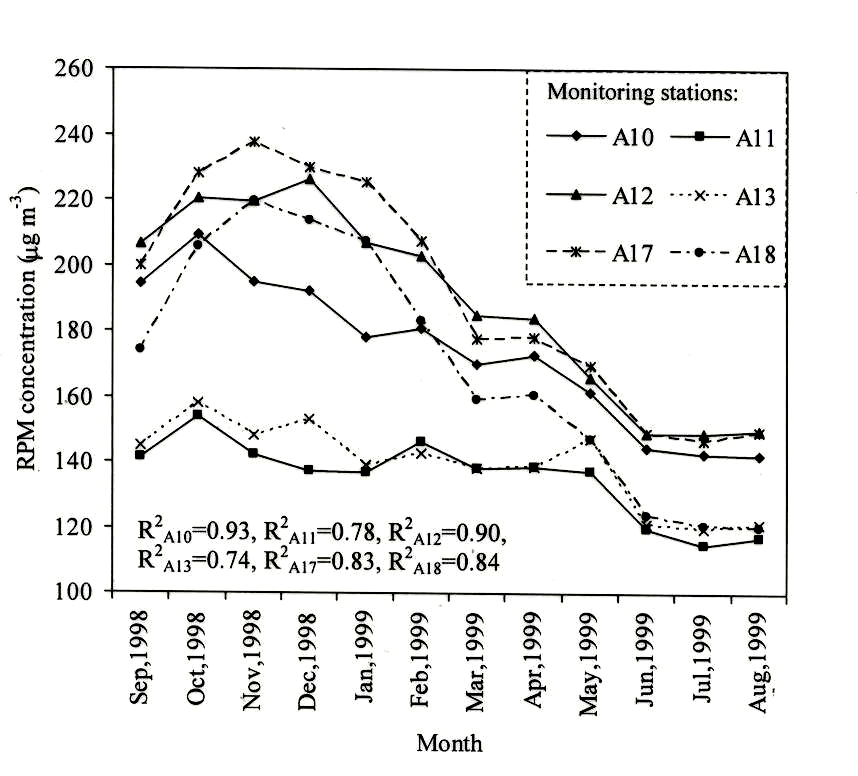
**

**Fig. II** Polynomial regression analysis of monthly average of RPM concentrationfor the

monitoring stations in the industrial area during one year period.

**
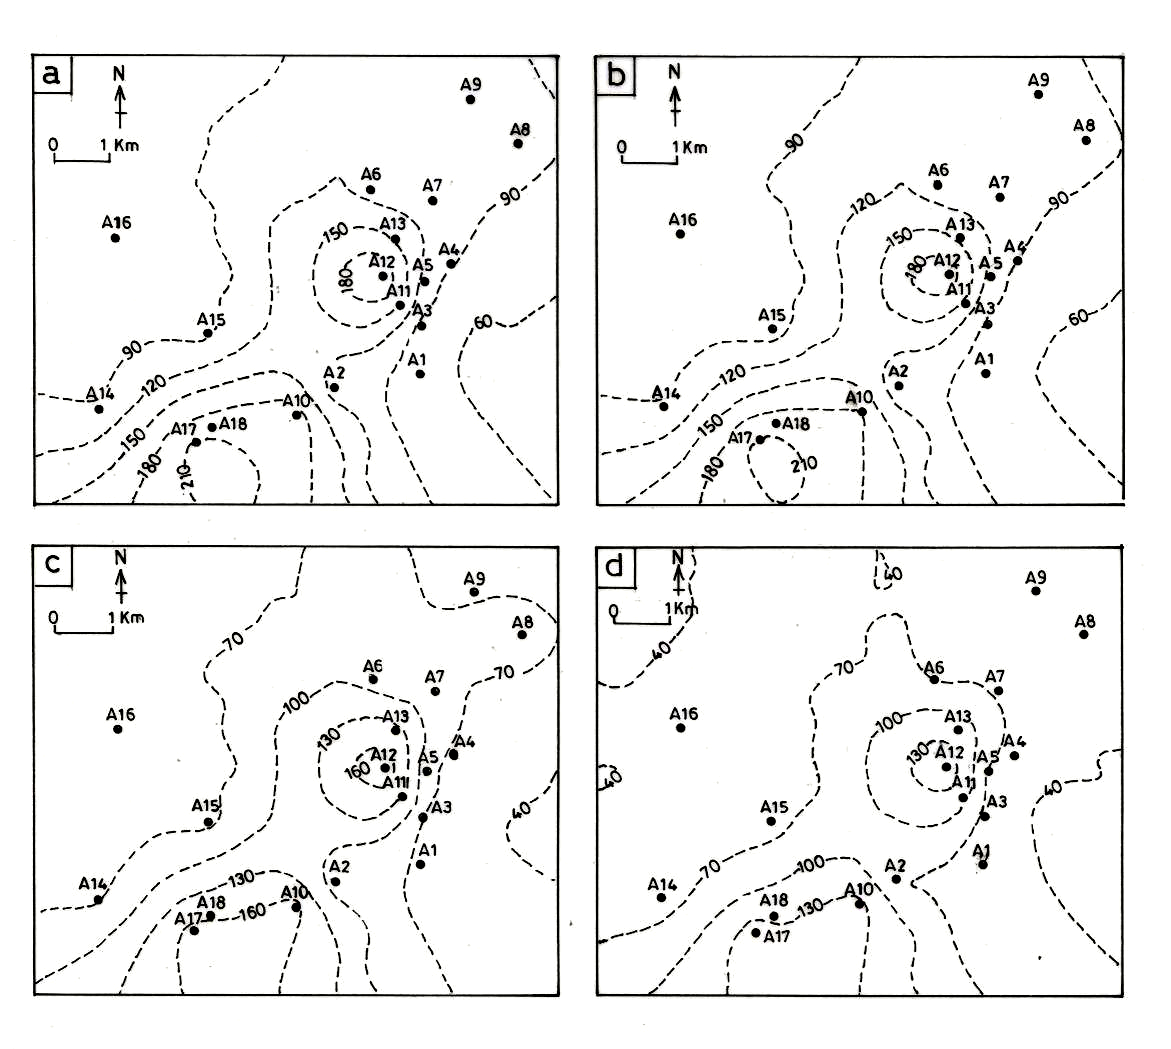
**

**Fig. III** Spatial distribution of seasonal RPM concentration in g m-3 over the study area for

(a) winter, (b) summer, (c) autumn and (d) rainy seasons.

**
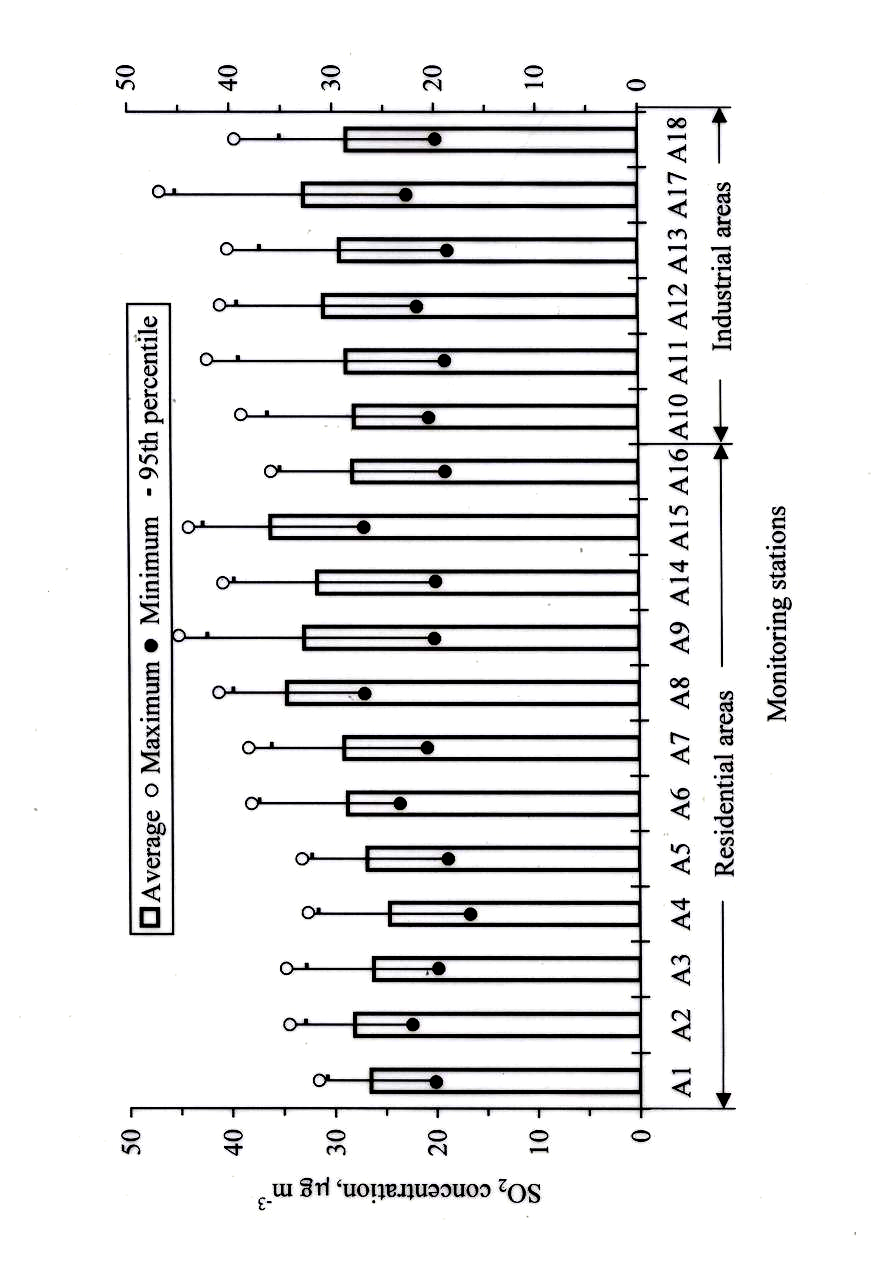
**

**Fig. IV** Variation of SO2 concentrations in the study area with annual average, and 24-hr

average maximum, minimum and 95th percentile values.

**
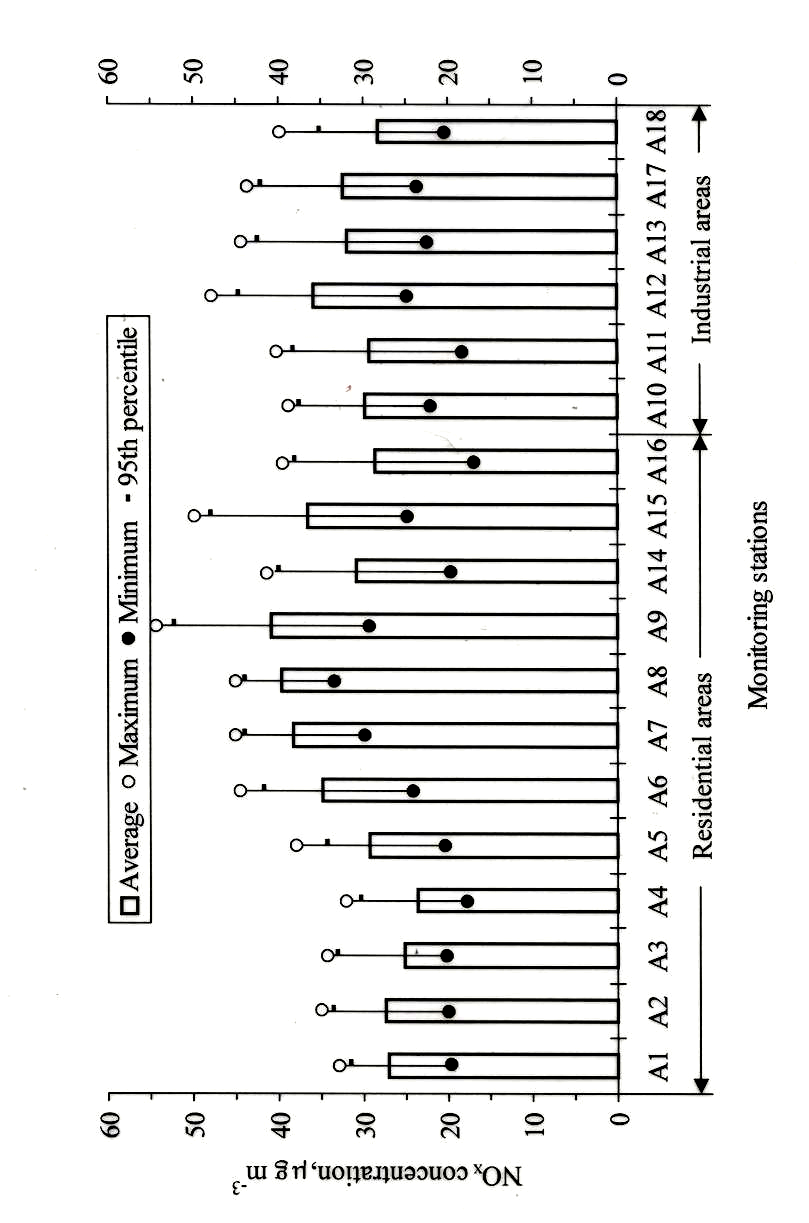
**

**Fig. V** Variation of NOx concentrations in the study area with annual average, and 24-hr average maximum, minimum and 95th percentile values.
